# Supplementary material for: Retrozymes are a unique family of non-autonomous retrotransposons with hammerhead ribozymes that propagate in plants through circular RNAs
Source: PubMed Central journal article supplement (PMC4918200; doi:10.1186/s13059-016-1002-4), 2016-06-23
Supplement: 13059_2016_1002_MOESM1_ESM.pdf [file 13059_2016_1002_MOESM1_ESM.pdf]

**Additional file 1.**

**Table 1.** Bioinformatic compilation of putative HHRs and retrozymes found in Phytozome v10.0 and GenBank (Aug 15 2014) sequence databases of plants (see Materials and Methods section for more information).

| Plant sp. <sup>i</sup>                                           | Acc. number                       | # HHRs              | # Retrozymes (~RNA size) |
|------------------------------------------------------------------|-----------------------------------|---------------------|--------------------------|
| <i>Actinidia chinensis</i>                                       | <a href="#">AONS00000000.1</a>    | 2                   | -                        |
| <i>Arabidopsis halleri</i>                                       | <a href="#">BASO00000000.1</a>    | 13                  | 3 (454-602 nt)           |
| <i>Arabidopsis lyrata</i> <small>subsp. lyrata</small>           | <a href="#">NZ_ADBK00000000.1</a> | 10                  | 2 (567-602 nt)           |
| <i>Arabidopsis lyrata</i> <small>subsp. petraea</small>          | <a href="#">BASP00000000.1</a>    | 10                  | 2 (582-744 nt)           |
| <i>Arabidopsis thaliana</i> <sup>ii</sup>                        | <a href="#">GCA_000001735</a>     | 2                   | -                        |
| <i>Artemisia annua</i> <sup>iii</sup>                            | <a href="#">txid35608</a>         | 3 <sup>vi</sup>     | 1 (503 nt)               |
| <i>Azadirachta indica</i>                                        | <a href="#">AMWY00000000.2</a>    | 108                 | 8 (757-776 nt)           |
| <i>Camelina sativa</i>                                           | <a href="#">JFZQ00000000.1</a>    | 6                   | -                        |
| <i>Capsella rubella</i>                                          | <a href="#">ANNY00000000.1</a>    | 18                  | 8 (584-606 nt)           |
| <i>Chlamydomonas reinhardtii</i>                                 | <a href="#">NZ_ABCN00000000.1</a> | 24 <sup>vi</sup>    | 6 (~2,000 nt)            |
| <i>Chorispora bungeana</i> <sup>iii</sup>                        | <a href="#">txid238895</a>        | 4                   | -                        |
| <i>Citrus clementina</i>                                         | <a href="#">AMZM00000000.1</a>    | 19                  | 13 (663-692 nt)          |
| <i>Citrullus lanatus</i>                                         | <a href="#">AGCB00000000.1</a>    | 2                   | -                        |
| <i>Citrus sinensis</i>                                           | <a href="#">AJPS00000000.1</a>    | 10                  | 11 (665-694 nt)          |
| <i>Citrus latifolia</i> <sup>iii</sup>                           | <a href="#">txid200541</a>        | 2                   | -                        |
| <i>Dahlia pinnata</i> <sup>iii</sup>                             | <a href="#">txid101596</a>        | 5                   | -                        |
| <i>Daucus carota</i>                                             | <a href="#">LNRQ00000000.1</a>    | 1                   | -                        |
| <i>Dianthus caryophyllus</i> <sup>v</sup>                        | <a href="#">BAUD00000000.1</a>    | 1 <sup>vi</sup> , 1 | Retroviroid              |
| <i>Eucalyptus camaldulensis</i>                                  | <a href="#">BADO00000000.1</a>    | 101                 | 26 (900-1034 nt)         |
| <i>Eucalyptus grandis</i>                                        | <a href="#">AUSX00000000.1</a>    | 132                 | 56 (908-1024 nt)         |
| <i>Fragaria ananassa</i>                                         | <a href="#">BATT00000000.1</a>    | 72                  | 8 (673-701 nt)           |
| <i>Helianthus argophyllus</i> <sup>iii</sup>                     | <a href="#">txid73275</a>         | 2                   | 1 (772 nt)               |
| <i>Helianthus paradoxus</i> <sup>iii</sup>                       | <a href="#">txid73304</a>         | 3                   | -                        |
| <i>Helianthus tuberosus</i> <sup>iii</sup>                       | <a href="#">txid4233</a>          | 1                   | -                        |
| <i>Ipomoea batatas</i> <sup>iii</sup>                            | <a href="#">txid4120</a>          | 1                   | -                        |
| <i>Ipomoea purpurea</i> <sup>iii</sup>                           | <a href="#">txid4121</a>          | 5                   | -                        |
| <i>Jatropha curcas</i>                                           | <a href="#">AFEW00000000.1</a>    | 30                  | 24 (693-790)             |
| <i>Lactuca perennis</i> <sup>iii</sup>                           | <a href="#">txid43195</a>         | 3                   | 1 (432 nt)               |
| <i>Lactuca sativa</i>                                            | <a href="#">AFSA00000000.1</a>    | 10                  | 8 (643-652 nt)           |
| <i>Mangifera indica</i> <sup>iii</sup>                           | <a href="#">txid29780</a>         | 3                   | -                        |
| <i>Manihot esculenta</i> <small>ssp. Flabellifolia (W14)</small> | <a href="#">JPQE00000000.1</a>    | 40                  | 34 (659-739 nt)          |
| <i>Manihot esculenta</i> Crantz <small>(KU50)</small>            | <a href="#">JPQF00000000.1</a>    | 28                  | 9 (660-719 nt)           |
| <i>Erythranthe guttata</i>                                       | <a href="#">APLE00000000.1</a>    | 3                   | -                        |
| <i>Morus notabilis</i>                                           | <a href="#">ATGF00000000.1</a>    | 2                   | -                        |
| <i>Nicotiana benthamiana</i>                                     | <a href="#">CBMM00000000.1</a>    | 1                   | -                        |
| <i>Nicotiana tabacum</i>                                         | <a href="#">AYMY00000000.1</a>    | 2 <sup>vi</sup>     | 1 (641 nt)               |
| <i>Oryza sativa</i>                                              | <a href="#">GCA_000005425.2</a>   | 2                   | 1 (466 nt)               |
| <i>Pachycladon fastigiatum</i> <sup>iii</sup>                    | <a href="#">txid106774</a>        | 1                   | 1 (626 nt)               |
| <i>Penstemon centranthifolius</i>                                | <a href="#">JPFH00000000.1</a>    | 2                   | 1 (678 nt)               |
| <i>Physcomitrella patens</i> <small>mitDNA</small>               | <a href="#">NC_007945.1</a>       | 2                   | -                        |
| <i>Picrorhiza kurroa</i> <sup>iii</sup>                          | <a href="#">txid195120</a>        | 1                   | -                        |
| <i>Selaginella moellendorffii</i> <sup>v</sup>                   | <a href="#">NZ_ADFJ00000000.1</a> | 111 <sup>vi</sup>   | 4 (757-994 nt)           |
| <i>Solanum melongena</i>                                         | <a href="#">BAUE00000000.1</a>    | 152                 | 18 (664-672 nt)          |
| <i>Solanum torvum</i> <sup>iii</sup>                             | <a href="#">txid119830</a>        | 2                   | -                        |
| <i>Vitis vinifera</i>                                            | <a href="#">CAAP00000000.3</a>    | 7                   | 7 (794-866 nt)           |

<sup>i</sup> Plant species not included in this table did not show the presence of HHR/retrozyme motifs at the moment of the analysis

<sup>ii</sup> (Przybilski et al., 2005)

<sup>iii</sup> Based on ESTs and Transcriptome Shotgun Assembly (TSA) sequences

<sup>iv</sup> (Daros and Flores, 1995)

<sup>v</sup> (Cervera and De la Peña, 2014)

<sup>vi</sup> Type I HHRs
