# Supplementary material for: Retrozymes are a unique family of non-autonomous retrotransposons with hammerhead ribozymes that propagate in plants through circular RNAs
Source: PubMed Central journal article supplement (PMC4918200; doi:10.1186/s13059-016-1002-4), 2016-06-23
Supplement: 13059_2016_1002_MOESM2_ESM.pdf [file 13059_2016_1002_MOESM2_ESM.pdf]

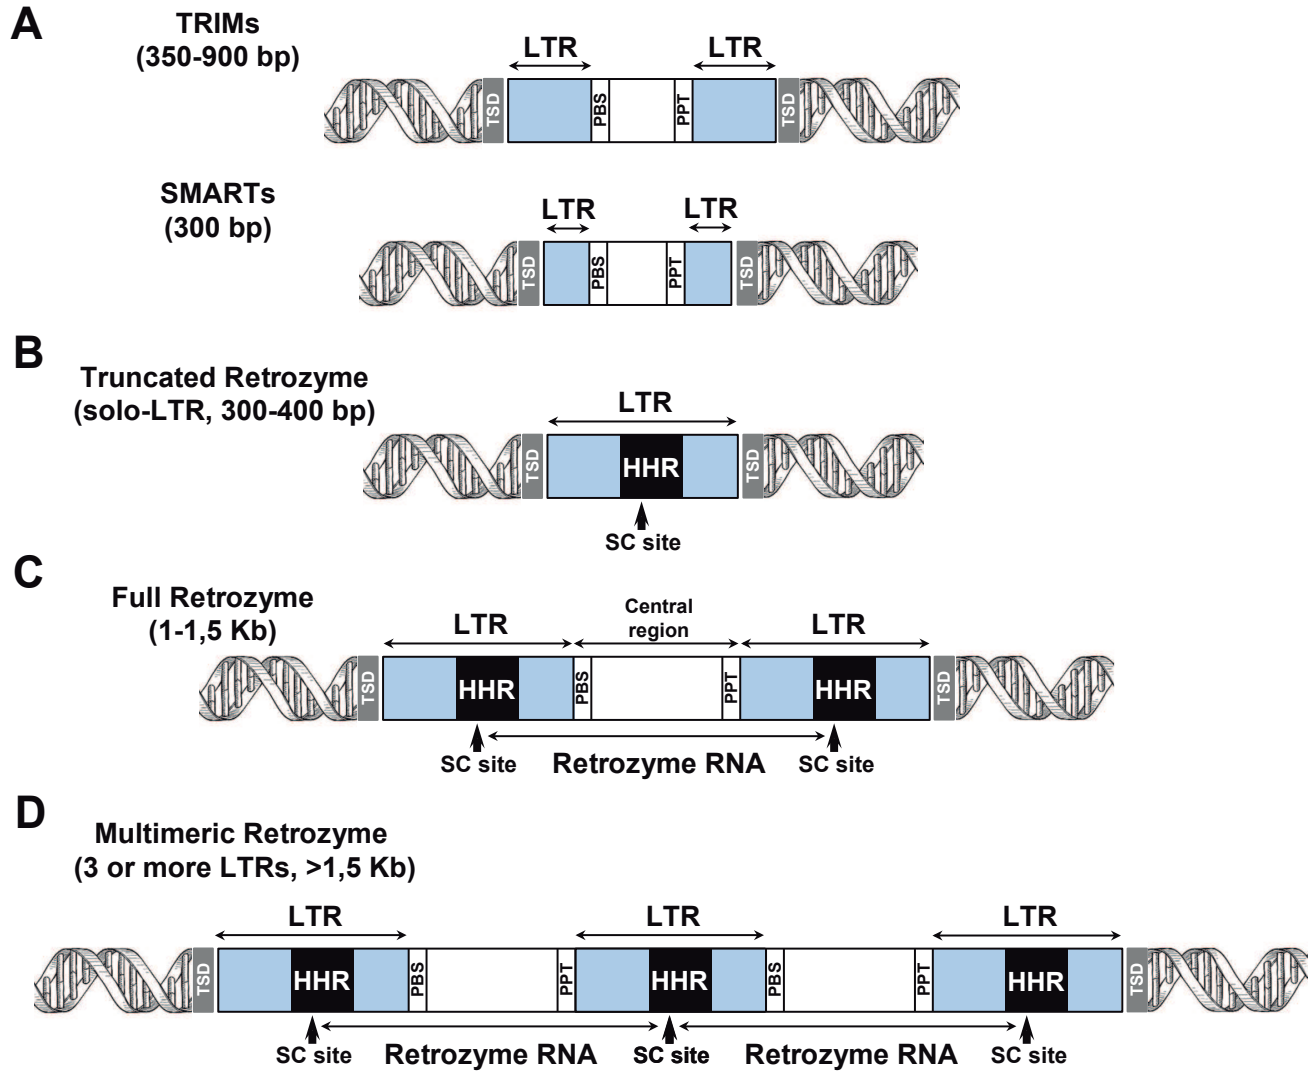

**Additional file 2.**

Schematic representation of small plant non-autonomous LTR-retrotransposons. **a** TRIM (top) and SMART (bottom) retroelements. **b** Truncated solo-LTR. **c** Full-copy retrozyme. **d** Multimeric retrozyme. LTRs are shown in blue color and the approximated sizes of the different elements and regions are indicated.
