# Supplementary material for: Retrozymes are a unique family of non-autonomous retrotransposons with hammerhead ribozymes that propagate in plants through circular RNAs
Source: PubMed Central journal article supplement (PMC4918200; doi:10.1186/s13059-016-1002-4), 2016-06-23
Supplement: 13059_2016_1002_MOESM3_ESM.pdf [file 13059_2016_1002_MOESM3_ESM.pdf]

**A**

|                      |           |    | 1          | 10        | 20                  | 30           | 40               | 50      | 60 |
|----------------------|-----------|----|------------|-----------|---------------------|--------------|------------------|---------|----|
| gi                   | 643709224 | gb | KK915179.1 | ACAACTGGT | CGAGAGCTGGGCCGCTCTC | CTGATGAGCCCA | TGGCAGGGCGAAACCA | GTGTGGT |    |
| gi                   | 643709224 | gb | KK915179.1 | ACAACTGGT | CGAGAGCTGGGCCGCTCTC | CTGATGAGCCCA | TGGCAGGGCGAAACCA | GTGTGGT |    |
| gi                   | 643740268 | gb | KK914224.1 | ACAACTGGT | CGAGAGCTGGGCCGCTCTC | CTGATGAGCCCA | TGGCAGGGCGAAACCA | GTGTGGT |    |
| gi                   | 643739396 | gb | KK914233.1 | ACAACTGGT | CGAGAGCTGGGCCGCTCTC | CTGATGAGCCCA | TGGCAGGGCGAAACCA | GTGTGGT |    |
| gi                   | 643736170 | gb | KK914294.1 | ACAACTGGT | CGAGAGCTGGGCCGCTCTC | CTGATGAGCCCA | TGGCAGGGCGAAACCA | GTGTGGT |    |
| gi                   | 643728304 | gb | KK914436.1 | ACAACTGGT | CGAGAGCTGGGCCGCTCTC | CTGATGAGCCCA | TGGCAGGGCGAAACCA | GTGTGGT |    |
| gi                   | 643739396 | gb | KK914233.1 | ACAACTGGT | CGAGAGCTGGGCCGCTCTC | CTGATGAGCCCA | TGGCAGGGCGAAACCA | GTGTGGT |    |
| gi                   | 643715065 | gb | KK914853.1 | ACAACTGGT | TGAGAGCTGGGCCGCTCTC | CTGATGAGCCCA | TGGCAGGGCGAAACCA | GTGTGGT |    |
| gi                   | 643707405 | gb | KK915321.1 | ACAACTGGT | TGAGAGCTGGGCCGCTCTC | CTGATGAGCCCA | TGGCAGGGCGAAACCA | GTGTGGT |    |
| gi                   | 643738870 | gb | KK914240.1 | ACAACTGGT | TGAGAGCTGGGCCGCTCTC | CTGATGAGCCCA | TGGCAGGGCGAAACCA | GTGTGGT |    |
| gi                   | 643735628 | gb | KK914309.1 | ACAACTGGT | AGGAGCTGGGCCGCTCTC  | CTGATGAGCCCA | TGGCAGGGCGAAACCA | GTGTGGT |    |
| gi                   | 643738870 | gb | KK914240.1 | ACAACTGGT | CGAGAGCTGGGCCGCTCTC | CTGATGAGCCCA | TGGCAGGGCGAAACCA | GTGTGGT |    |
| gi                   | 643741048 | gb | KK914214.1 | ACAACTGGT | TGAGAGCTGGGCCGCTCTC | CTGATGAGCCCA | TGGCAGGGCGAAACCA | GTGTGGT |    |
| gi                   | 643715065 | gb | KK914853.1 | ACAACTGGT | TGAGAGCTGGGCCGCTCTC | CTGATGAGCCCA | TGGCAGGGCGAAACCA | GTGTGGT |    |
| gi                   | 643730881 | gb | KK914367.1 | ACAACTGGT | CGGAGCTGGGCCGCTCTC  | CTGATGAGCCCA | TGGCAGGGCGAAACCA | GTGTGGT |    |
| gi                   | 643725280 | gb | KK914531.1 | ACAACTGGT | CGGAGCTGGGCCGCTCTC  | CTGATGAGCCCA | TGGCAGGGCGAAACCA | GTGTGGT |    |
| gi                   | 643711457 | gb | KK915001.1 | ACAACTGGT | CGGAGCTGGGCCGCTCTC  | CTGATGAGCCCA | TGGCAGGGCGAAACCA | GTGTGGT |    |
| gi                   | 643729452 | gb | KK914408.1 | ACAACTGGT | CGGAGCTGGGCCGCTCTC  | CTGATGAGCCCA | TGGCAGGGCGAAACCA | GTGTGGT |    |
| gi                   | 643726030 | gb | KK914502.1 | ACAACTGGT | CGGAGCTGGGCCGCTCTC  | CTGATGAGCCCA | TGGCAGGGCGAAACCA | GTGTGGT |    |
| gi                   | 643725337 | gb | KK914529.1 | ACAACTGGT | CGGAGCTGGGCCGCTCTC  | CTGATGAGCCCA | TGGCAGGGCGAAACCA | GTGTGGT |    |
| gi                   | 643740348 | gb | KK914223.1 | ACAACTGGT | CGGAGCTGGGCCGCTCTC  | CTGATGAGCCCA | TGGCAGGGCGAAACCA | GTGTGGT |    |
| gi                   | 643722379 | gb | KK914589.1 | ACAACTGGT | TGAGAGCTGGGCCGCTCTC | CTGATGAGCCCA | TGGCAGGGCGAAACCA | GTGTGGT |    |
| gi                   | 643722379 | gb | KK914589.1 | ACAACTGGT | CGAGAGCTGGGCCGCTCTC | CTGATGAGCCCA | TGGCAGGGCGAAACCA | GTGTGGT |    |
| gi                   | 643701409 | gb | KK916171.1 | ACAACTGGT | CGAGAGCTAGGCCGCTCTC | CTGATGAGCCCA | TGGCAGGGCGAAACCA | GTGTGGT |    |
| gi                   | 643735948 | gb | KK914299.1 | ACAACTGGT | CGAGAGCTAGGCCGCTCTC | CTGATGAGCCCA | TGGCAGGGCGAAACCA | GTGTGGT |    |
| gi                   | 643739880 | gb | KK914227.1 | ACAACTGGT | CGAGAGCTGGGCCGCTCTC | CTGATGAGCCCA | TGGCAGGGCGAAACCA | GTGTGGT |    |
| gi                   | 643715753 | gb | KK914810.1 | ACAACTGGT | CGAGAGCTGGGCCGCTCTC | CTGATGAGCCCA | TGGCAGGGCGAAACCA | GTGTGGT |    |
| gi                   | 643736170 | gb | KK914294.1 | ACAACTGGT | CGAGAGCTGGGCCGCTCTC | CTGATGAGCCCA | TGGCAGGGCGAAACCA | GTGTGGT |    |
| gi                   | 643722520 | gb | KK914582.1 | ACAACTGGT | TGAGAGCTAGGCCGCTCTC | CTGATGAGCCCA | TGGCAGGGCGAAACCA | GTGTGGT |    |
| gi                   | 643722520 | gb | KK914582.1 | ACAACTGGT | TGAGAGCTAGGCCGCTCTC | CTGATGAGCCCA | TGGCAGGGCGAAACCA | GTGTGGT |    |
| <i>consensus</i> >70 |           |    |            | ACAACTGGT | TGAGAGCTAGGCCGCTCTC | CTGATGAGCCCA | TGGCAGGGCGAAACCA | GTGTGGT |    |

**B**

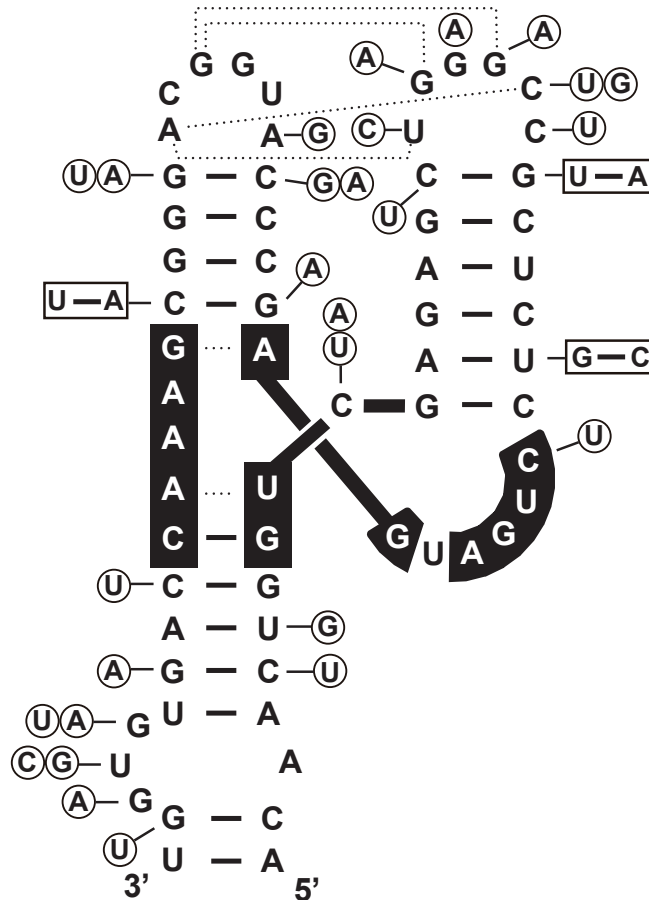

### **Additional file 3.**

Hammerhead ribozymes in the genome of *Jatropha curcas*. **a** Sequence alignment of the 30 *bona fide* HHRs detected in the genome of *J. curcas* (Bioprojects: PRJNA63485 and PRJNA279873). Only 5 out of the 30 HHRs show identical sequences, whereas the other 25 motifs showed one or more changes. **b** Secondary structure of the *J. curcas* HHRs. Variable positions are indicated within circles (single changes) or boxes (co-variations). Conserved tertiary interactions between loops 1 and 2 are shown with dotted lines.
