# Supplementary material for: Retrozymes are a unique family of non-autonomous retrotransposons with hammerhead ribozymes that propagate in plants through circular RNAs
Source: PubMed Central journal article supplement (PMC4918200; doi:10.1186/s13059-016-1002-4), 2016-06-23
Supplement: 13059_2016_1002_MOESM11_ESM.pdf [file 13059_2016_1002_MOESM11_ESM.pdf]

**A** *Philodina roseola*, Rtz 174 nt  
(Rotifer)

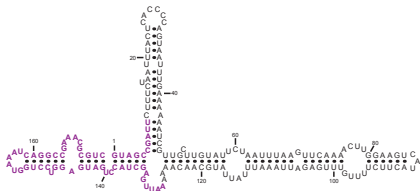

**B** *Pseudodiploria strigosa*, Rtz 243 nt  
(Coral)

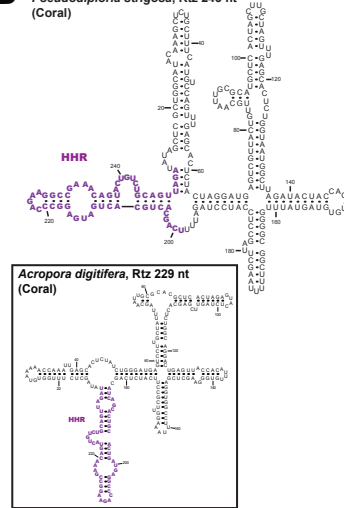

**C** *Agrilus planipennis*, Rtz 310 nt  
(Arthropod)

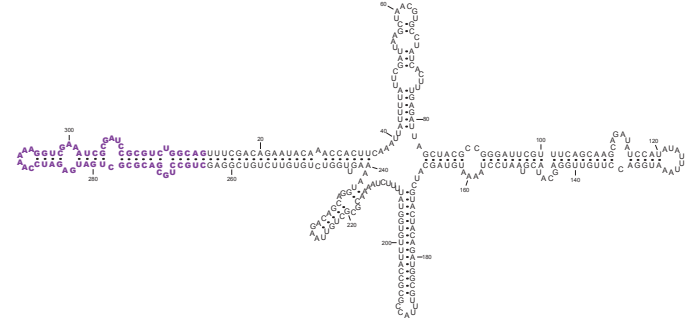

**D** *Mytilus galloprovincialis*, Rtz 375 nt  
(Mollusk)

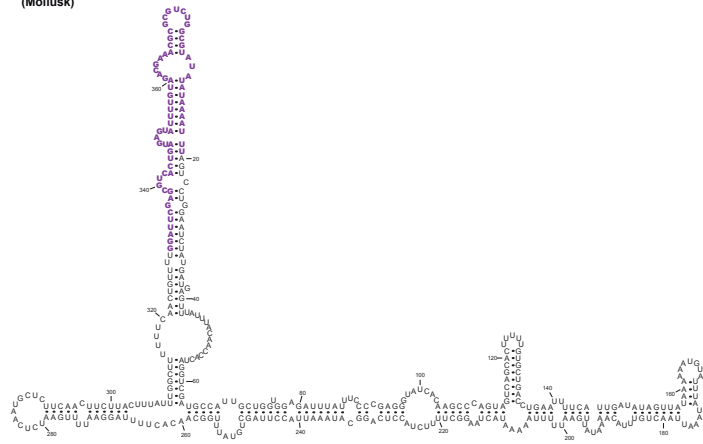

**E** *Xenopus tropicalis*, Rtz 274 nt  
(Vertebrate)

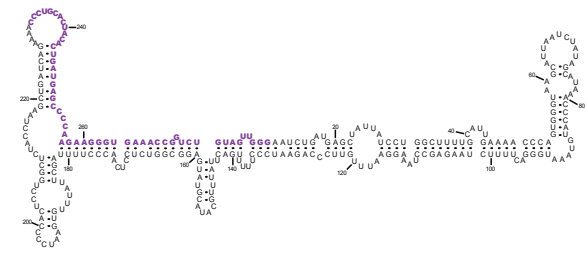

**Additional file 11.**

Minimum free energy secondary structure prediction of putative retrozyme RNAs of metazoan genomes from different phyla, like **a** rotifers, **b** corals, **c** arthropods, **d** mollusks and **e** vertebrates, deduced from the corresponding sequence repeats with HHRs. HHR sequences are shown in purple letters and the self cleavage sites are indicated with an arrow. Numbering starts after the HHR self-cleavage site.
