# Supplementary material for: Retrozymes are a unique family of non-autonomous retrotransposons with hammerhead ribozymes that propagate in plants through circular RNAs
Source: PubMed Central journal article supplement (PMC4918200; doi:10.1186/s13059-016-1002-4), 2016-06-23
Supplement: 13059_2016_1002_MOESM12_ESM.pdf [file 13059_2016_1002_MOESM12_ESM.pdf]

Additional file 12.

Table 2. Oligonucleotide compilation.

| Plant species                   | Name      | Type    | Primer sequence (5'-3')             | Motif                                      |
|---------------------------------|-----------|---------|-------------------------------------|--------------------------------------------|
| <i>Jatropha curcas</i>          | Jc60D     | Forward | GGAGGATCCYACGGACAAATTCGTRACCGTG     | PPT and LTR 5' end                         |
|                                 | Jc60FullR | Reverse | GTCTCTAGACATCCTCCCCACTCAAACCAG      |                                            |
| <i>Jatropha curcas</i>          | Jc60AdjD  | Forward | CCGTGACAGAGTGGTATCAGAGCAG           | LTR 3' end and PBS                         |
|                                 | Jc60R     | Reverse | CGGTCTAGAGTCTCGCGCAGCACTGCGCCC      |                                            |
| <i>Jatropha curcas</i>          | Jc77D     | Forward | TGGTCTAGAAGCAATGGCGGAGTCTAGGCACC    | Central region                             |
|                                 | Jc77R     | Reverse | CGAGGATCCAAGACACAGGGCGGTACTTTTGAC   |                                            |
| <i>Fragaria ananassa</i>        | Fa87D     | Forward | GAGTGTCTAGACCCGCTTTYGGGAGTGTATYATG  | PPT and LTR 5' end                         |
|                                 | Fa85R     | Reverse | CTCTCCCCACCAAACAAGGTGTACG           |                                            |
| <i>Fragaria ananassa</i>        | Fa92D     | Forward | TTGAgGATCctTAAAAGTTGAAACTTAC        | Full genomic retrozyme<br>(BATT01039028.1) |
|                                 | Fa92R     | Reverse | CTTTTctaGAACAAAGATCATATTGTCA        |                                            |
| <i>Eucalyptus camaldulensis</i> | Ec72D     | Forward | CACGGATCCGTGAATYCTCCCGTACYCGTGA     | PPT and LTR 5' end                         |
|                                 | Ec72R     | Reverse | ACAWTCTAGACCACTCAATTCGCAACGCCCTCGTT |                                            |
| <i>Citrus sinensis</i>          | Cs70D     | Forward | CTTAGGATCCTGTACGGACYGCAATCGTGGCACCC | PPT and LTR 5' end                         |
|                                 | Cs70R     | Reverse | GTCTTCTAGATTCTCCACCGCCATAACCATGC    |                                            |
